# Supplementary material for: Muc5b Is the Major Polymeric Mucin in Mucus from Thoroughbred Horses With and Without Airway Mucus Accumulation
Source: PubMed Central journal article supplement (PMC3094342; doi:10.1371/journal.pone.0019678), 2011-05-13
Supplement: pone.0019678.s001.pdf [file pone.0019678.s001.pdf]

| <b>Sample number</b> | <b>MANeq5ac-I reactivity</b> | <b>MANeq5b-I reactivity</b> | <b>Mucus score</b> | <b>Total bacterial count</b> |
|----------------------|------------------------------|-----------------------------|--------------------|------------------------------|
| 1                    | 0.0000                       | 19.5060                     | 3                  | 5.3384                       |
| 2                    | 0.0000                       | 0.0000                      | 0                  | 1.6020                       |
| 3                    | 11.7227                      | 8.3278                      | 2                  | 2.7243                       |
| 4                    | 0.0531                       | 0.0000                      | 0                  | 0.0000                       |
| 5                    | 2.1014                       | 0.0000                      | 0                  | 2.6812                       |
| 6                    | 1.0877                       | 0.0000                      | 0                  | 2.0792                       |
| 7                    | 44.1465                      | 77.3198                     | 2                  | 3.1847                       |
| 8                    | 4.5685                       | 16.1960                     | 2                  | 3.1673                       |
| 9                    | 5.3793                       | 0.0000                      | 0                  | 1.6020                       |
| 10                   | 0.5000                       | 0.0000                      | 1                  | 2.0792                       |
| 11                   | 6.5000                       | 1.4541                      | 0                  | 2.9777                       |
| 12                   | 0.5500                       | 0.0000                      | 1                  | 2.0000                       |
| 13                   | 1.6668                       | 0.0000                      | 0                  | 2.8977                       |
| 14                   | 20.0000                      | 38.3181                     | 2                  | 4.0766                       |
| 15                   | 0.0000                       | 0.0000                      | 0                  | 0.0000                       |
| 16                   | 34.3167                      | 36.1923                     | 2                  | 2.8062                       |
| 17                   | 2.9372                       | 0.0000                      | 0                  | 2.1461                       |
| 18                   | 14.8000                      | 47.0000                     | 2                  | 0.0000                       |
| 19                   | 8.8000                       | 8.4000                      | 2                  | 3.1004                       |
| 20                   | 0.0000                       | 2.4120                      | 0                  | 0.0000                       |
| 21                   | 7.7000                       | 3.0000                      | 2                  | 2.5185                       |
| 22                   | 0.9792                       | 0.0000                      | 0                  | 0.0000                       |
| 23                   | 0.0000                       | 0.0000                      | 0                  | 2.7853                       |
| 24                   | 13.7367                      | 28.0915                     | 2                  | 4.8232                       |
| 25                   | 58.2402                      | 24.8115                     | 2                  | 2.1761                       |
| 26                   | 0.0000                       | 0.0000                      | 0                  | 1.9542                       |
| 27                   | 40.7247                      | 6.2400                      | 3                  | 4.9638                       |
| 28                   | 0.0000                       | 0.0000                      | 0                  | 0.0000                       |
| 29                   | 0.0000                       | 0.4000                      | 0                  | 1.0000                       |
| 30                   | 0.0000                       | 0.4306                      | 0                  | 2.7730                       |
| 31                   | 73.3286                      | 31.1741                     | 2                  | 5.9783                       |
| 32                   | 7.9576                       | 15.6000                     | 3                  | 5.7324                       |
| 33                   | 0.0000                       | 0.0000                      | 0                  | 2.9777                       |
| 34                   | 0.0000                       | 66.5787                     | 3                  | 7.5441                       |
| 35                   | 0.0000                       | 0.0000                      | 0                  | 1.0000                       |
| 36                   | 0.0000                       | 0.0000                      | 0                  | 2.7708                       |
| 37                   | 0.0000                       | 0.0000                      | 0                  | 2.6434                       |
| 38                   | 6.8950                       | 0.0000                      | 0                  | 2.6812                       |
| 39                   | 19.9568                      | 5.8563                      | 0                  | 3.0000                       |
| 40                   | 11.9718                      | 47.9460                     | 1                  | 3.0334                       |
| 41                   | 3.5669                       | 0.0000                      | 0                  | 3.6263                       |
| 42                   | 0.0000                       | 0.0000                      | 0                  | 2.1761                       |
| 43                   | 4.2799                       | 0.0000                      | 1                  | 3.1931                       |
| 44                   | 0.0000                       | 0.0000                      | 0                  | 2.6232                       |
| 45                   | 0.0000                       | 0.0000                      | 1                  | 1.0000                       |
| 46                   | 0.0000                       | 0.0000                      | 0                  | 1.4771                       |
| 47                   | 0.0000                       | 0.0000                      | 0                  | 1.0000                       |
| 48                   | 4.2461                       | 0.0000                      | 1                  | 2.7324                       |

|    |         |          |   |         |
|----|---------|----------|---|---------|
| 49 | 0.0000  | 0.0000   | 1 | 2.9085  |
| 50 | 6.7807  | 46.9447  | 0 | 7.5241  |
| 51 | 9.1607  | 19.5793  | 0 | 4.6543  |
| 52 | 0.0000  | 0.0000   | 2 | 4.3358  |
| 53 | 13.5582 | 83.5566  | 2 | 3.0755  |
| 54 | 0.0000  | 0.0000   | 1 | 0.0000  |
| 55 | 5.7265  | 6.8083   | 1 | 2.6628  |
| 56 | 3.1373  | 0.0000   | 0 | 10.0000 |
| 57 | 13.4212 | 9.7918   | 1 | 4.6813  |
| 58 | 0.0000  | 0.0000   | 0 | 1.4771  |
| 59 | 13.4511 | 10.0554  | 0 | 3.4362  |
| 60 | 0.3153  | 2.5936   | 2 | 2.9445  |
| 61 | 0.0000  | 0.0000   | 0 | 0.0000  |
| 62 | 3.4372  | 0.3295   | 1 | 3.2833  |
| 63 | 0.0000  | 0.0000   | 1 | 2.8751  |
| 64 | 46.0991 | 17.1581  | 0 | 4.7561  |
| 65 | 0.0000  | -0.0482  | 0 | 2.6128  |
| 66 | 0.0000  | 0.0000   | 1 | 4.6304  |
| 67 | 0.0000  | 0.0000   | 0 | 1.7782  |
| 68 | 50.6597 | 53.2990  | 1 | 3.1703  |
| 69 | 11.2406 | 0.0000   | 0 | 2.6232  |
| 70 | 0.0000  | 0.0000   | 0 | 2.1761  |
| 71 | 0.0000  | 0.0000   | 0 | 1.7782  |
| 72 | 0.0000  | 0.0000   | 1 | 0.0000  |
| 73 | 3.1000  | 0.6232   | 0 | 0.0000  |
| 74 | 0.0000  | 0.0000   | 0 | 2.5051  |
| 75 | 0.0000  | 0.0000   | 0 | 3.1959  |
| 76 | 0.0000  | 0.0000   | 0 | 3.1206  |
| 77 | 15.2969 | 11.1787  | 0 | 4.6990  |
| 78 | 1.1613  | 0.0000   | 1 | 2.0792  |
| 79 | 0.0000  | 0.0000   | 0 | 1.7782  |
| 80 | 0.0000  | 0.0000   | 0 | 2.7243  |
| 81 | 0.5904  | 0.0000   | 0 | 2.6902  |
| 82 | 0.0000  | 0.0000   | 0 | 2.2304  |
| 83 | 0.0000  | 0.0000   | 0 | 0.0000  |
| 84 | 0.0000  | 0.0000   | 0 | 1.8451  |
| 85 | 0.0000  | 1.3374   | 1 | 0.0000  |
| 86 | 6.4075  | 18.5569  | 2 | 3.6053  |
| 87 | 14.8036 | 22.6821  | 2 | 2.6812  |
| 88 | 1.5661  | 1.2239   | 1 | 3.1644  |
| 89 | 0.0000  | 0.0000   | 0 | 0.0000  |
| 90 | 0.0000  | 0.0000   | 0 | 1.7782  |
| 91 | 0.0000  | 0.0000   | 1 | 0.0000  |
| 92 | 0.0000  | 0.0000   | 0 | 0.0000  |
| 93 | 69.4575 | 121.8949 | 1 | 4.7172  |
| 94 | 13.0262 | 32.7260  | 0 | 3.4669  |
| 95 | 1.6500  | 0.0000   | 0 | 3.3655  |
| 96 | 0.0000  | 0.0000   | 1 | 2.4314  |
| 97 | 0.0000  | 0.0000   | 1 | 2.5051  |
| 98 | 0.0000  | 0.0000   | 1 | 1.6990  |

|     |          |          |   |         |
|-----|----------|----------|---|---------|
| 99  | 0.0000   | 1.8336   | 1 | 1.9542  |
| 100 | 0.0000   | 0.0000   | 0 | 2.1461  |
| 101 | 0.0000   | 1.3930   | 0 | 10.0000 |
| 102 | 0.0000   | 6.0695   | 1 | 1.7782  |
| 103 | 3.7838   | 27.3000  | 1 | 2.4150  |
| 104 | 0.4885   | 30.0172  | 1 | 2.7076  |
| 105 | 2.6408   | 6.8180   | 2 | 2.8513  |
| 106 | 34.2132  | 27.5671  | 0 | 5.0693  |
| 107 | 2.6835   | 6.9438   | 0 | 5.0128  |
| 108 | 13.5681  | 16.2144  | 1 | 4.8148  |
| 109 | 3.0355   | 5.7985   | 0 | 3.5302  |
| 110 | 51.1121  | 51.7028  | 0 | 5.0141  |
| 111 | 0.0000   | 2.4556   | 1 | 1.4771  |
| 112 | 10.8411  | 12.9503  | 1 | 3.3927  |
| 113 | 0.7020   | 0.0000   | 1 | 2.0414  |
| 114 | 59.0739  | 105.7870 | 2 | 3.0719  |
| 115 | 13.1931  | 43.1708  | 1 | 4.3690  |
| 116 | 0.2914   | 0.6373   | 1 | 2.7634  |
| 117 | 0.0000   | 0.8033   | 0 | 1.6990  |
| 118 | 0.0000   | 0.0000   | 0 | 2.0792  |
| 119 | 2.9602   | 0.2325   | 0 | 2.1461  |
| 120 | 7.7685   | 16.9410  | 0 | 2.4624  |
| 121 | 3.7601   | 4.1977   | 1 | 1.6990  |
| 122 | 5.0150   | 4.4912   | 1 | 4.7278  |
| 123 | 0.0000   | 0.0000   | 0 | 0.0000  |
| 124 | 0.0000   | 0.0000   | 0 | 0.0000  |
| 125 | 16.1120  | 33.0431  | 2 | 0.0000  |
| 126 | 0.9857   | 3.1177   | 1 | 2.8325  |
| 127 | 0.0000   | 0.4316   | 1 | 1.9542  |
| 128 | 0.0000   | 0.0000   | 0 | 0.0000  |
| 129 | 0.0000   | 0.0000   | 1 | 0.0000  |
| 130 | 0.0000   | 0.0000   | 0 | 1.9031  |
| 131 | 0.0000   | 0.1094   | 0 | 1.0000  |
| 132 | 0.0000   | 0.0000   | 0 | 3.0374  |
| 133 | 0.0000   | 0.0000   | 0 | 3.0043  |
| 134 | 29.8781  | 16.1285  | 1 | 4.9494  |
| 135 | 22.9877  | 9.3399   | 0 | 4.7860  |
| 136 | 20.7835  | 22.2621  | 1 | 2.3802  |
| 137 | 19.9250  | 14.1923  | 1 | 3.0212  |
| 138 | 108.4258 | 59.8320  | 2 | 2.9685  |
| 139 | 47.5913  | 60.8828  | 1 | 3.0294  |
| 140 | 0.0000   | 0.0000   | 1 | 1.6990  |
| 141 | 0.0000   | 0.0000   | 0 | 1.7782  |
| 142 | 0.0000   | 0.0000   | 1 | 1.6020  |
| 143 | 46.9294  | 79.7457  | 1 | 1.9031  |
| 144 | 4.5529   | 7.6837   | 0 | 1.3010  |
